# Supplementary material for: A porous micro/nano-structured polyethylene film prepared using a picosecond laser for agricultural passive cooling
Source: Royal Society of Chemistry journal article supplement (doi:10.1039/d3nr06262g), 2024-01-01
Supplement: d3nr06262g1.pdf [file d3nr06262g1.pdf]

## Supporting Information

### Porous micro/nano-structured polyethylene film prepared by picosecond laser for agricultural passive cooling

Qingwei Wang<sup>1,2</sup>, Dongkai Chu<sup>1,2\*</sup>, Qilin Wang<sup>1,2</sup>, Xiangyue Xu<sup>1,2</sup>, Kai Yin<sup>3\*</sup>, Shuoshuo Qu<sup>1,2</sup>,  
Peng Yao<sup>1,2,4\*</sup>, Chuanzhen Huang<sup>5</sup>

This file contains Supplementary Fig. S1-S12 and Video S1.

---

<sup>1</sup> Center for Advanced Jet Engineering Technologies (CaJET), School of Mechanical Engineering, Shandong University, Jinan, Shandong, 250061, China. E-mail address: chudongkai@sdu.edu.cn (D. Chu); yaopeng@sdu.edu.cn (P. Yao).

<sup>2</sup> Key Laboratory of High Efficiency and Clean Mechanical Manufacture, Shandong University, Ministry of Education, Jinan, Shandong, 250061, China

<sup>3</sup> Hunan Key Laboratory of Nanophotonics and Devices, School of Physics and Electronics, Central South University, Changsha 410083, China. E-mail address: kaiyin@csu.edu.cn (K. Yin).

<sup>4</sup> Shenzhen Research Institute of Shandong University, Shenzhen, Guangdong, 518000, China

<sup>5</sup> School of Mechanical Engineering, Yanshan University, Qinhuangdao, 066004, Hebei, China

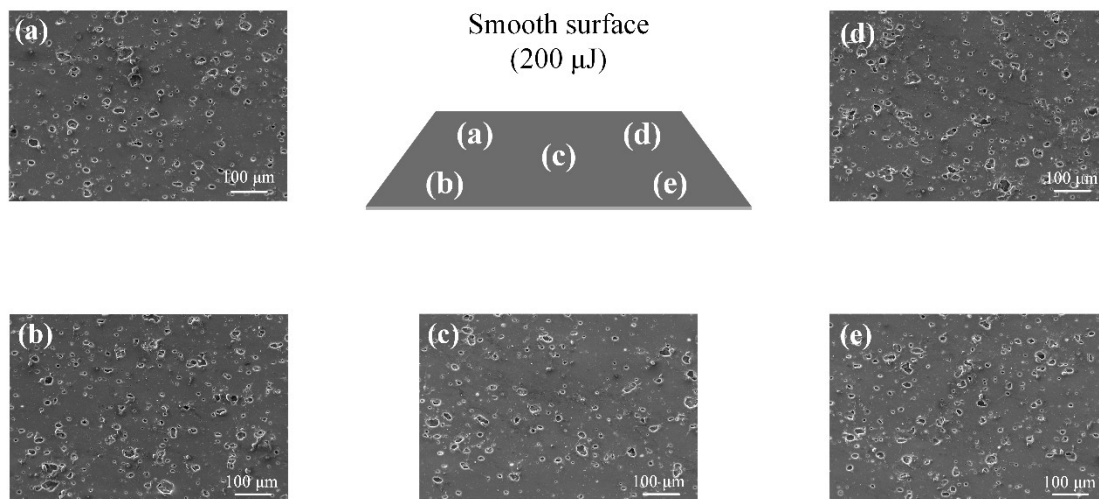

**Figure S1.** Morphological characteristics (SEM images) at different positions on the SLS (200  $\mu\text{J}$ ) film surface.

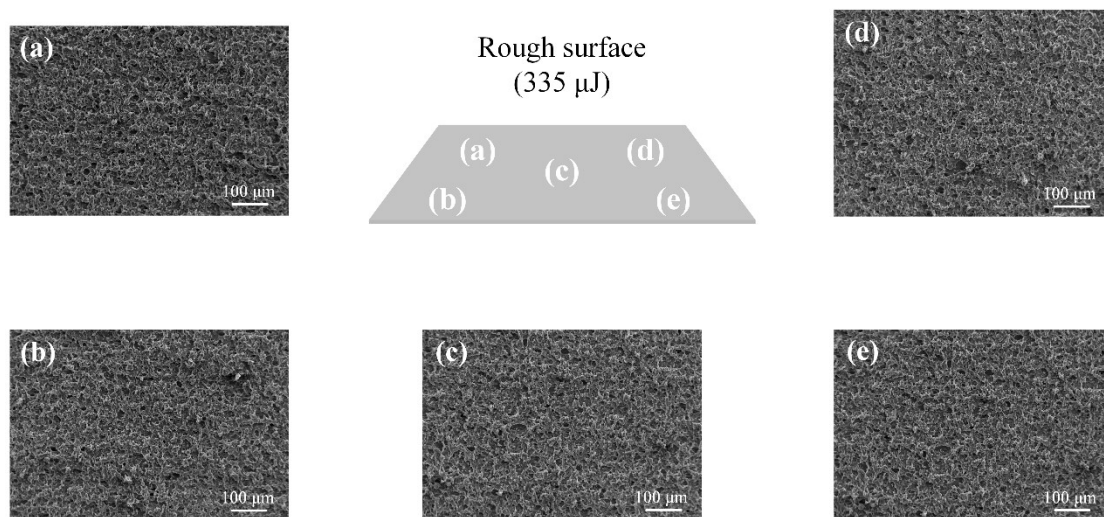

**Figure S2.** Morphological characteristics (SEM images) at different positions on the RHS (335  $\mu\text{J}$ ) film surface.

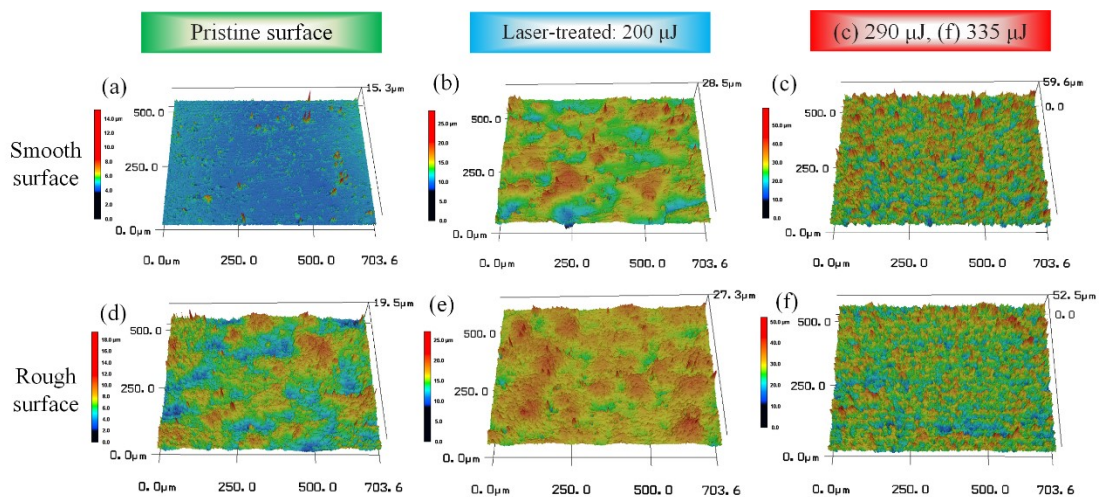

**Figure S3.** The morphology of SPE (a), SLS (b), SHS (c), RPE (d), RLS (e), and RHS (f) films observed by laser confocal microscopy.

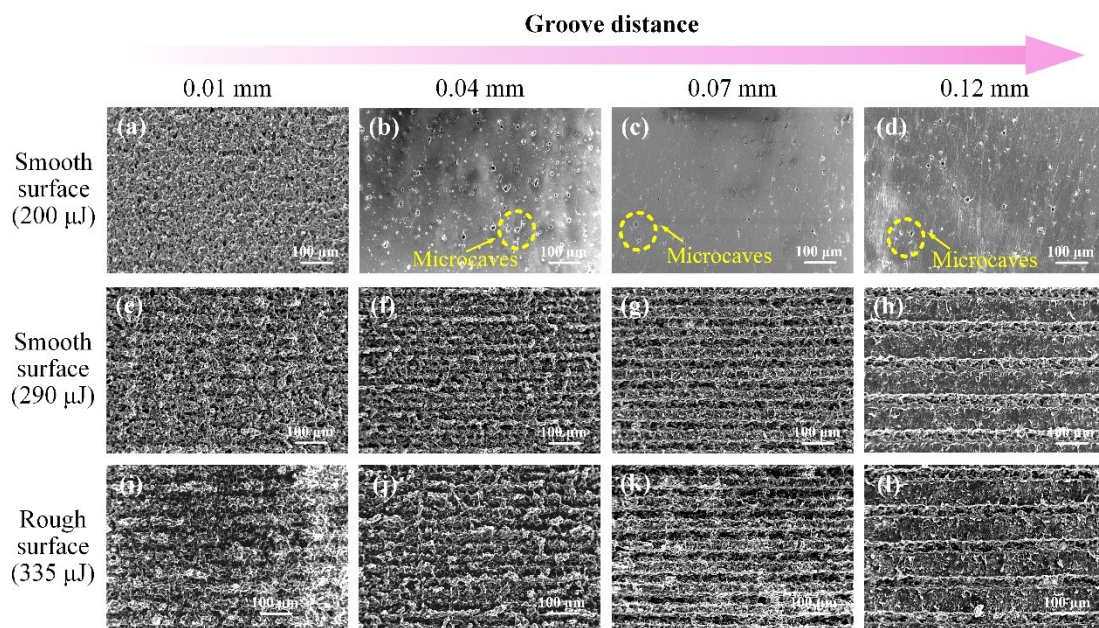

**Figure S4.** Morphology characteristics of PE films at different laser energies and groove distance.

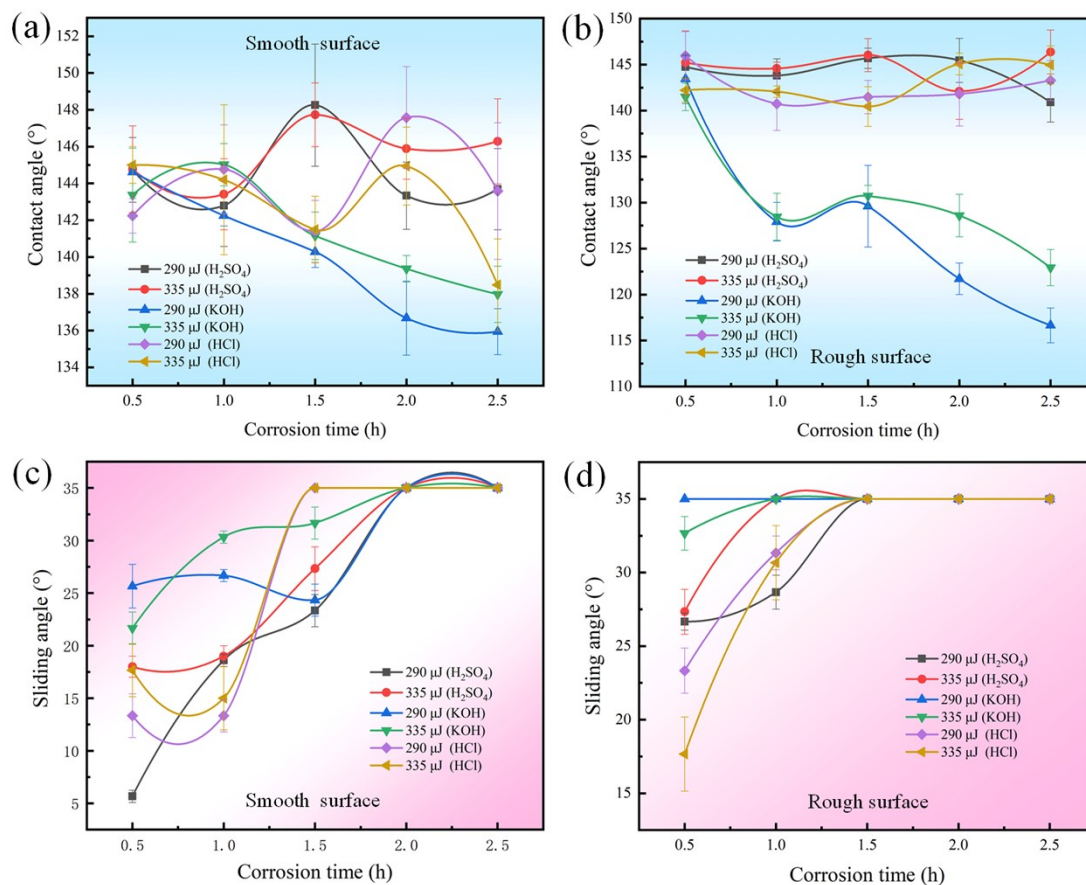

**Figure S5.** WCAs of the smooth (a) and rough (b) surface films (0.04 mm groove spacing), SAs of the smooth (c) and rough (d) surface films (0.04 mm groove spacing) after 2.5 h of corrosion.

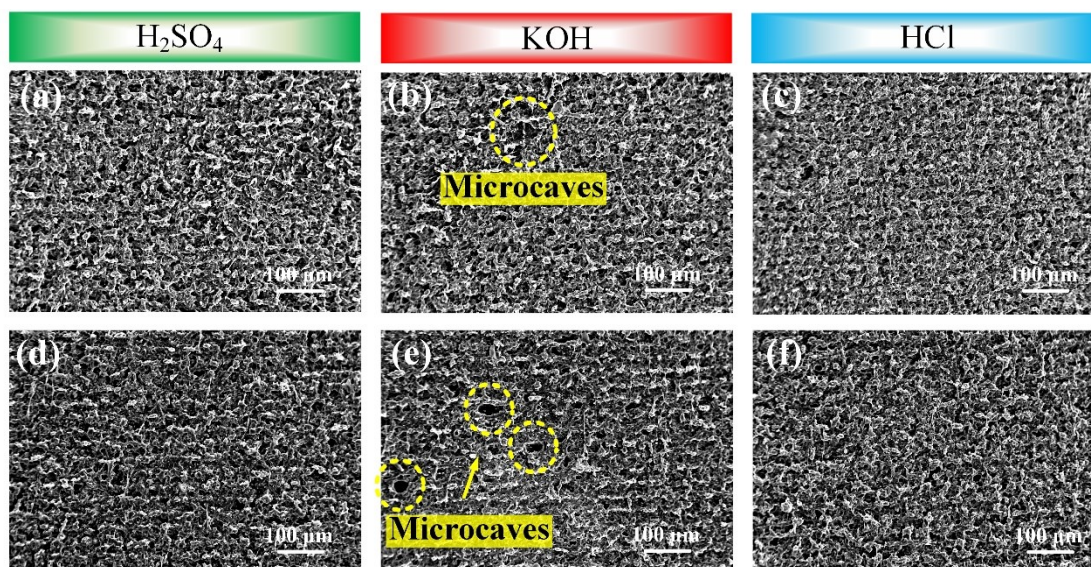

**Figure S6.** The surface morphology of the film after H<sub>2</sub>SO<sub>4</sub>, KOH, and HCl corrosion. (a-c) SHS (290 μJ laser power, 0.03 mm groove spacing). (d-f) RHS (335 μJ laser power, 0.03 mm groove spacing).

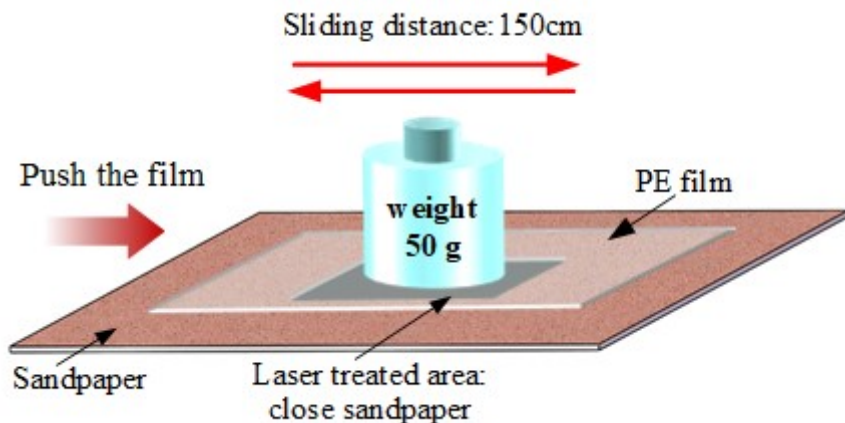

**Figure S7.** Schematic diagram of the sandpaper abrasion tests on laser-treated PE films.

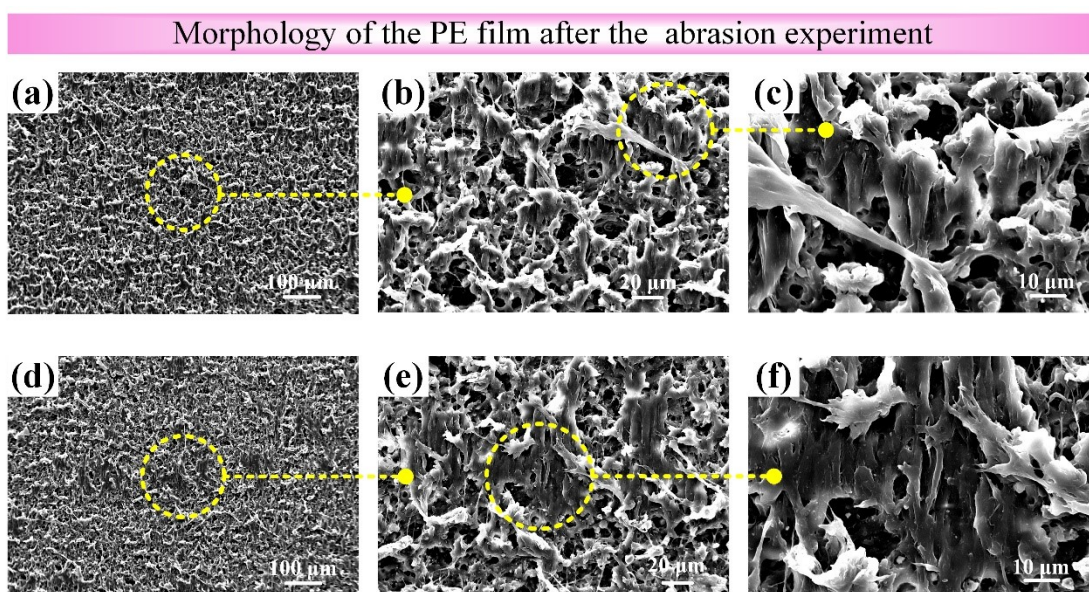

**Figure S8.** Surface morphology of SHS (a) and RHS (d) films after sandpaper abrasion tests. (b), (c), (e), and (f) are the corresponding magnified images.

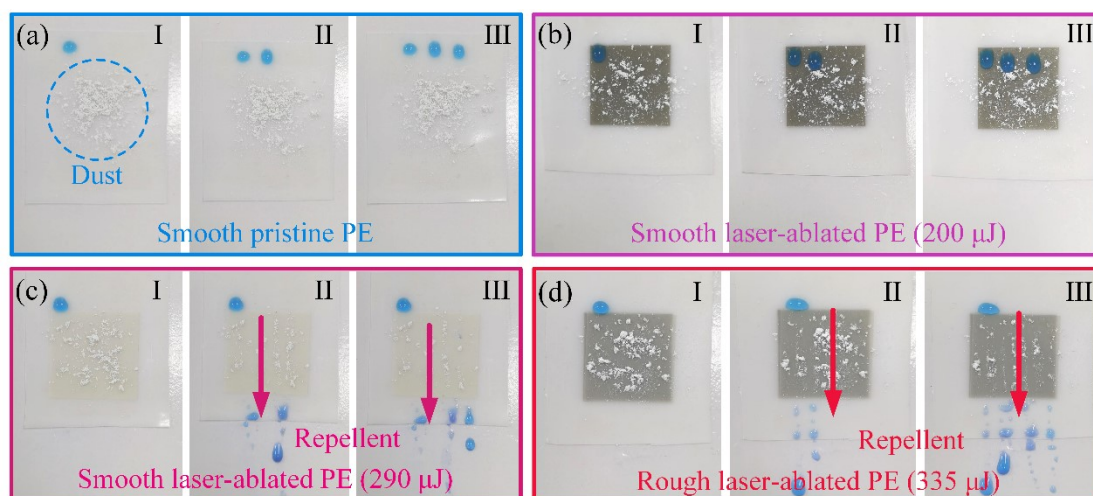

**Figure S9.** Self-cleaning property text of the SPE (a), SLS (b), SHS (c), and RHS (d) film.

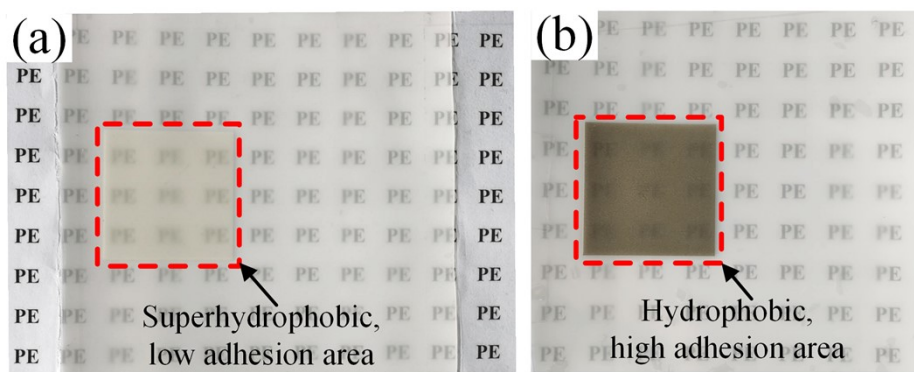

**Figure S10.** Transparency of pristine and laser-treated PE films. The morphology and transparency of the superhydrophobic and low sliding angle (a), hydrophobic and high sliding angle (b) area prepared by laser in the red dotted box.

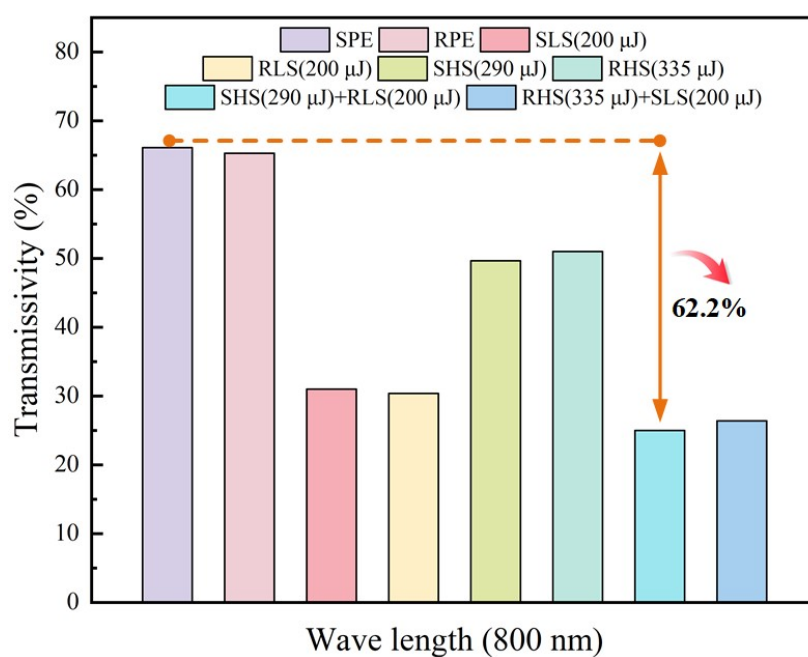

**Figure S11.** The transmissivity of pristine and laser-ablated PE films at 800 nm wavelength.

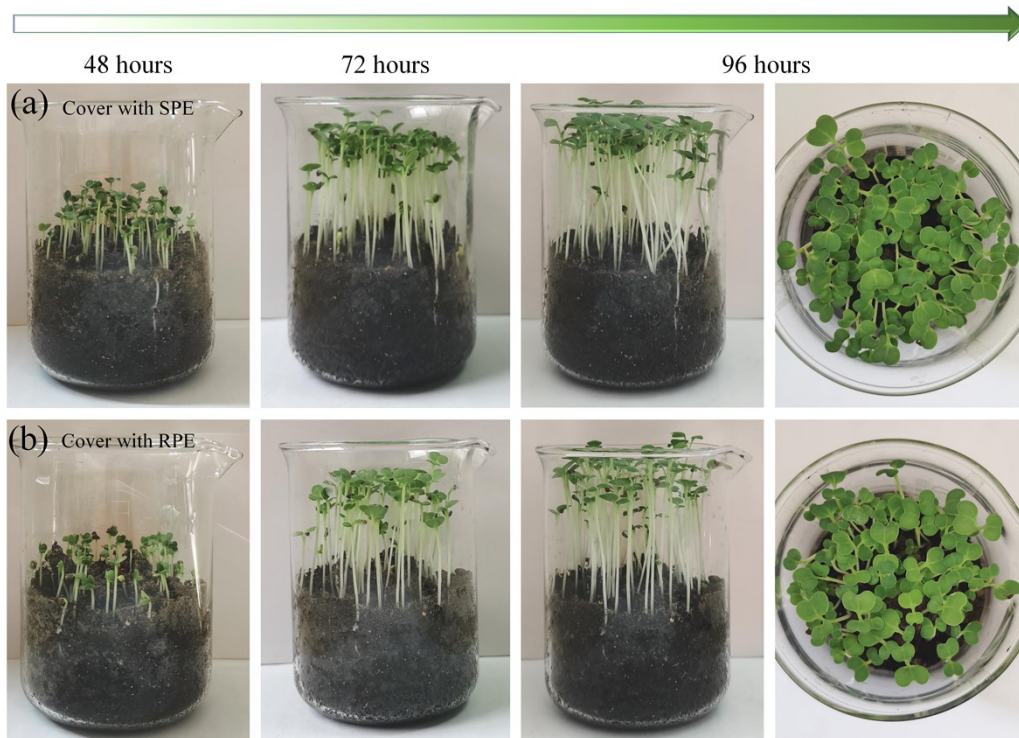

**Figure S12.** The growth of plants covered with pristine PE film. (a) SPE, (b) RPE.

Video S1 Movement of water droplets on superhydrophobic and low adhesion film surfaces (RHS).
